# Supplementary material for: EZH2 negatively regulates PD-L1 expression in hepatocellular carcinoma
Source: J Immunother Cancer. 2019 Nov 14;7:300. doi: 10.1186/s40425-019-0784-9 (PMC6854886; doi:10.1186/s40425-019-0784-9)
Supplement: Supplementary file 3 — Additional file 3: Table S7. The genes predicted in Fig. 3c. [file 40425_2019_784_MOESM3_ESM.xls]

## Sheet: Sheet1
Additional file 3: Table S7. The genes predicted in figure 3C
PROMO	cBioportal
JUN GATA1 TBP STAT5A NF1 FOXP3 HNF1B HOXD9 HOXD10 PGR NR3C1 CEBPB POU2F1 STAT4 ELK1 MYB E2F1 STAT1 IRF1 RXRA NFATC2 PAX5 TP53 GCFC2 PPARA NFKB1 SP1 NFATC1 AR XBP1 IRF2 VDR PEX5 HNF1A GATA2 ATF3 ESR1 NFIC FOXA1	ADCY7 ADD2 AIM1 ABCD2 AKR1B1 TTC24 ANK1 ANXA1 AOAH FASLG CD200R1 RHOH BCAT1 BICD1 PRDM1 C1QB C1QC C3AR1 NLRC3 FMNL1 CALU CAMK4 CASP1 CASP5 RUNX2 RUNX3 CBLB CD2 CD3E CD3G CD247 CD5 CD6 CD8A CD80 CD86 TNFRSF8 TNFSF8 CD38 CD44 CD53 CD72 CDH11 CHN1 CCR1 CCR5 CCR8 CMKLR1 SCLT1 COL6A3 FAM171B CR1 CSF1R CSF2RB CYBB DYNC1LI2 DOCK2 DUSP2 DUSP4 ADGRE1 EVI2A EVI2B EYA3 FCGR1A FCGR1B FCGR2A FCGR3A GPX8 FOSL2…
PROMO: Predict transcription factors (TFs) that could potentially bind to P1 promoter
cBioportal: Screen genes co-expressed with CD274 in TCGA HCC tissues (Both Pearson and Spearman r ≥0.3 or ≤ -0.3)
r, expression correlation coefficient
