# Supplementary material for: EZH2 negatively regulates PD-L1 expression in hepatocellular carcinoma
Source: J Immunother Cancer. 2019 Nov 14;7:300. doi: 10.1186/s40425-019-0784-9 (PMC6854886; doi:10.1186/s40425-019-0784-9)
Supplement: Supplementary file 4 — Additional file 4: Table S8. List of differentially expressed gene between immune-activated and immune-suppressed HCC tissues screened by transcriptome. [file 40425_2019_784_MOESM4_ESM.xls]

## Sheet: Sheet1
Additional file 4: Table S8: List of differentially expressed gene between immune-activated and immune-suppressed HCC tissues screened by transcriptome profiling analysis
GeneSymbol	FC (immune-suppressed/immune-activated)	P-Value
MZB1	20.9305	0.00203685
IGLL1	14.7331	0.00088983
LOC102724332	13.2366	0.000664229
IL4I1	12.4922	0.00968476
CD19	12.2688	0.0248177
GZMB	10.5166	0.001937
MIAT	10.4102	0.000123227
SNAR-B2	7.9715	0.0392825
SLC16A3	6.92727	0.00771346
FAM46C	6.85125	0.00150252
POU2AF1	6.48928	0.000750867
ALOX5AP	6.312	0.00622337
CCDC109B	5.40503	0.000123407
SNAR-A3	5.33658	0.0346788
SIRPG	5.19707	0.000267229
SP140	4.88909	3.90971e-07
PCED1B-AS1	4.86347	2.10154e-05
NYX	4.80227	0.0199827
RUNX3	4.64132	0.0103795
RUNX3	4.55019	0.00466946
TLR2	4.45309	0.00220666
CTSC	4.38575	0.00295255
PIM2	4.37995	0.000928537
RAPH1	4.35313	0.0142388
VAV1	4.26995	0.00110322
GPNMB	4.25448	0.000348351
CIITA	4.2492	0.000728153
LY75	4.22679	0.00607698
CD37	4.17247	0.00235904
LAPTM5	4.00268	0.000540115
TRAF3IP3	3.91893	2.04565e-05
LAMP3	3.88426	0.0107245
LINC00958	3.87311	0.0384663
PTPRC	3.84287	0.000229236
CD2	3.78026	0.000773382
CD52	3.74449	0.00101186
S1PR4	3.73475	0.00133411
C1QA	3.69274	0.0102704
CCR5	3.63111	0.00405862
SCRN1	3.62371	0.0274864
CCR1	3.604	0.000436492
IL2RB	3.59979	0.000713808
OAS2	3.5813	0.0266488
PTPRC	3.5762	7.57208e-05
WIPF1	3.53741	5.31324e-06
DOCK10	3.47991	0.0306982
DOCK8	3.47827	4.98068e-05
WIPF1	3.46779	9.72408e-06
LCP2	3.42924	0.000651101
CARD9	3.36387	0.0378703
CORO1A	3.34424	0.000350817
LSP1	3.24431	0.000610732
HLA-DPA1	3.237	0.00807034
CCL3	3.21593	0.0015038
CMKLR1	3.18141	0.000382002
LILRB2	3.15814	0.0132122
HLA-DPA1	3.15407	0.00161253
SLA	3.15309	0.000180118
ADAM8	3.14303	0.0142099
GLIPR2	3.10193	0.00222567
LOC339192	3.07117	0.00242195
HLA-DRB1	3.05738	0.00519715
GPAT2	3.04134	0.0325331
PTPRC	3.03808	0.000103388
STK17B	3.02905	9.34502e-05
HLA-DPB1	3.02291	0.00565921
PCNXL2	3.01337	0.0148084
MYO1F	3.00806	0.00188068
PVRIG	2.99265	0.00193988
ZNF714	2.9768	0.00461598
TRAF3IP3	2.97028	0.00154483
TNFAIP8	2.96986	0.0140279
TNFAIP8	2.95095	0.00279652
CMKLR1	2.94258	0.00106369
S100A6	2.94215	0.030872
INPP5D	2.91263	9.14574e-05
lnc-VN1R2-1	2.90358	0.00603407
ALPK1	2.89071	0.000605078
PFKFB3	2.88929	0.00616597
CECR1	2.87194	0.000367637
SLC8A1	2.85125	0.00539865
CTSC	2.83715	0.00126369
IRF7	2.832	0.0141318
IFI6	2.81637	0.0208195
FAM49A	2.80769	0.0170839
HLA-DPB1	2.79678	0.00793674
HLA-DPB1	2.78792	0.0153146
HLA-A	2.78607	0.00540514
ITGA4	2.78415	0.000143338
PARVG	2.78157	0.0022752
HLA-DPB1	2.77621	0.00932413
HIVEP3	2.75737	0.0145918
MSR1	2.75201	0.00199894
IL10RA	2.7315	0.000232506
CCL3L3	2.7191	0.00258302
PCED1B-AS1	2.68611	0.000252185
TAP2	2.68427	0.0162057
MTHFD2	2.67601	0.00566119
ARHGAP25	2.67332	0.000837254
MS4A6A	2.66173	0.0129303
LSP1	2.65701	0.00910672
RHPN1	2.64972	0.0291722
RASSF5	2.64779	0.0025263
GSTM3	2.62643	0.0284505
PLXDC2	2.62541	0.0301523
LRRC8B	2.6048	9.02685e-05
NPL	2.59808	0.0313404
STK17B	2.58346	4.97426e-05
TEP1	2.58094	0.00323135
SP140	2.567	3.49799e-06
ST8SIA4	2.56394	0.000169516
SLC44A2	2.56172	0.0150049
RGS10	2.54844	0.000362459
TLR1	2.54594	0.0127736
SH3BGRL	2.54277	0.0112539
GPR132	2.45947	0.000744985
GMFG	2.45103	0.000884366
GSTP1	2.43432	0.046314
GPR68	2.39374	0.0101202
NPL	2.37989	0.0317382
SLC8A1	2.37452	0.00190214
RCSD1	2.35975	0.000454977
CD83	2.35682	0.00175903
PDK1	2.32451	0.00458059
TRPV2	2.28863	0.026691
PHF19	2.27471	0.00156606
CD163L1	2.26652	0.00730508
FXYD5	2.26135	0.009779
CLIC2	2.26009	0.0482538
GLIPR2	2.25616	0.0293499
SCPEP1	2.23905	0.0143761
PLA2G7	2.23588	0.00911441
ARL4C	2.22997	0.0133773
CTSC	2.21395	0.00511907
lnc-VN1R2-1	2.2094	0.0131569
TMSB4X	2.18755	0.00138756
KCNAB2	2.18226	0.00344782
TMSB4X	2.17332	0.00057266
FCN1	2.16344	0.0170523
ARAP2	2.12508	0.00309906
PDE4DIP	2.11884	0.0241354
SLC31A2	2.11088	0.0104143
SLC2A14	2.1005	0.0149177
GIMAP4	2.10039	0.00115282
KIAA0040	2.09857	0.0426296
SYNGR2	2.07183	0.00521599
PTPN6	2.07176	0.00230824
B2M	2.05952	0.0122998
SEMA4D	2.05654	0.0448905
ASNS	2.04254	0.0305136
SYNGR2	2.03714	0.00985691
ANKRD44	2.02379	0.0001632
TCEAL6	2.02252	0.00954268
FAM110A	2.01335	0.0352845
GCA	2.00815	0.00206418
SPIRE1	2.00579	0.0492034
LAP3	2.00523	0.0314018
VMA21	2.00474	0.00525286
SEMA6C	0.496231	0.0292131
SHC2	0.495987	0.015532
SLC9A3R2	0.495747	0.025104
FAM134A	0.492341	0.000149038
LOC100506538	0.491191	0.00212445
FAXDC2	0.487468	0.0425937
NRBP2	0.486736	0.00578846
PQLC1	0.485592	0.0225654
DLC1	0.484196	0.00131043
EIF4EBP2	0.484061	0.00134204
PXMP4	0.481593	0.00325871
ABCC6	0.478309	0.0248875
SELO	0.474544	0.00127634
PROC	0.474312	0.0489281
STBD1	0.472828	0.00276322
TMEM56	0.472367	0.033423
C11orf54	0.471508	0.00314213
MARCH2	0.470921	0.0125393
ADAMTS13	0.468538	0.0368087
HSD17B11	0.468326	0.00171691
RPL37	0.467313	0.0109951
C14orf1	0.462216	0.0053784
SMARCA1	0.460407	0.00892213
CERS4	0.45367	0.0034176
HSD17B11	0.453485	0.00224042
GSTO1	0.451194	0.00183521
FARP1	0.450301	0.0253945
LINC00969	0.449971	0.0474315
NDRG2	0.449192	0.0382055
FBXO31	0.448676	0.00413678
CYP2J2	0.446451	0.0279976
CLDN14	0.446031	0.0154127
SLC25A10	0.444249	0.0113641
PNPLA3	0.443789	0.00955552
CYP51A1	0.441328	0.0102407
PQLC1	0.437865	0.0406952
DAK	0.437494	0.0125049
ALAD	0.437409	0.0198033
DAK	0.432668	0.00464446
ITIH2	0.430187	0.0249549
SLC38A3	0.429697	0.012482
ZDHHC11	0.429235	0.0231188
MAOB	0.42746	0.00649595
DEPDC7	0.424035	0.00377712
PRKAB2	0.418182	0.00156837
PIPOX	0.417125	0.0195241
LOC102723811	0.416489	0.0286786
ABCC6	0.41328	0.00149069
LOC171391	0.412971	0.0151015
ZNF331	0.412733	0.0393495
POR	0.412342	0.00587876
TEF	0.40883	0.00945632
TCAIM	0.408211	0.0494556
AKR7A2P1	0.407479	0.0180209
ZDHHC11	0.407419	0.0261609
AMY1C	0.406588	0.0338833
SHMT1	0.405473	0.0378327
TTC28	0.401174	0.00329246
ATP2B2	0.399383	0.0497313
SAP30L	0.394672	0.00013026
GPER1	0.389328	0.0220406
C1orf115	0.38537	0.00834369
DBH-AS1	0.382348	0.0274629
AKR7A3	0.37848	0.011421
COBL	0.377865	0.00637279
GPER1	0.377078	0.0149947
ABCC6	0.376984	0.00329154
CHN2	0.364789	0.0020003
CLYBL	0.362528	0.0179234
GLYCTK	0.360144	0.0260665
PLA2G12B	0.354295	0.00147028
ARG1	0.351348	0.0115809
PSD3	0.350078	0.0318978
SMOC1	0.349146	0.00108907
APBB3	0.347902	0.0403257
LOC100131796	0.34778	0.000506192
EVA1A	0.347577	0.000793004
F7	0.342496	0.0107464
ECM2	0.342066	0.011534
RGN	0.340638	0.00366871
APOC2	0.339599	0.0212299
EPHX1	0.335404	0.00538129
CHN2	0.330697	0.000459161
APOM	0.323567	0.0221959
GPT2	0.319246	0.0357798
PAH	0.309113	0.00059528
CCL14	0.308189	0.00898068
SLC6A1	0.305794	0.0113063
ZBTB16	0.303847	0.0225164
SARDH	0.303347	0.00165969
lnc-SCCPDH-1	0.294922	0.0079925
ELOVL2	0.290903	0.0168328
SLC2A2	0.27735	0.00428716
KLKB1	0.270584	0.0355935
CYP3A7	0.26507	0.0355954
CYP3A7	0.265047	0.00329115
SARDH	0.257274	0.00438773
HGD	0.236615	0.00907149
FMO5	0.235455	0.00695483
SERPINC1	0.219285	0.00318387
FMO5	0.215955	0.0131021
CYP4A11	0.205838	0.0439504
F5	0.19275	0.000130419
PDK4	0.180834	0.0153185
APOC4	0.109805	0.0297516
Note: FC, fold change.
